# Supplementary material
Source: Springer Nature journal article supplement (https://www.springermedizin.de/resource/supplementary/12935_2011_315_MOESM1_ESM.pdf/9540292)
Supplement: MOESM1 [file 9540292]

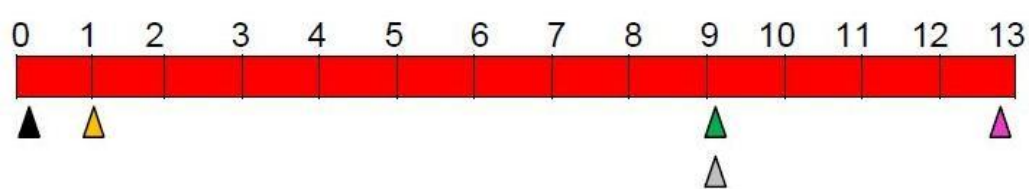

▲ Supplementation of silymarin and EGb for groups 3 and 4 respectively till the end of experiment.

▲ NDEA administration in groups (2-6) till the end of experiment.

▲ Confirmation of the induction of HCC.

▲ Supplementation of silymarin and EGb for groups 5 and 6 respectively till the end of experiment.

▲ Dissection of rats.
